# Supplementary material
Source: ML conference proceedings conference paper supplement (https://openaccess.thecvf.com/content/CVPR2026/html/Ma_Learning_Straight_Flows_CVPR_2026_paper.html)
Supplement: Supplementary file 1 [file Ma_Learning_Straight_Flows_CVPR_2026_supplemental.pdf]

# Learning Straight Flows: Variational Flow Matching for Efficient Generation

## Supplementary Material

### 1. Proofs for Straight, Non-Intersecting Interpolations

This appendix provides a self-contained development of the analytical concepts and proofs underlying our method. We introduce a *straight, non-intersecting interpolation*  $Z$  that is *compatible* with the linear interpolation induced by a given coupling  $X$ , and we establish the following properties: (i) preservation of time marginals, (ii) reduction of convex transport costs, (iii) equivalent characterizations of straight (non-intersecting) couplings, and (iv) equivalence with vanishing time derivative.

**Notation.** For a random process  $X = \{X_t\}_{t \in [0,1]}$ , write  $\text{Law}(X_t)$  for its marginal law at time  $t$ , and  $\mathbb{E}[\cdot]$  for expectation. For a coupling  $(X_0, X_1)$  we denote  $\Delta^X := X_1 - X_0$  and the linear interpolant  $X_t = (1-t)X_0 + tX_1$ . Conditional expectations such as  $\mathbb{E}[\Delta^X | X_t = x]$  are understood whenever they exist.

#### 1.1. Preliminaries

**Definition 1** (Coupling, linear interpolation, and conditional velocity). Let  $(X_0, X_1)$  be any coupling on  $\mathbb{R}^d$  with joint density  $\rho(x_0, x_1) = \rho_0(x_0)\rho_1(x_1)$ . Define the linear interpolation

$$\begin{aligned} X_t &= (1-t)X_0 + tX_1, \quad t \in [0, 1] \\ \Delta^X &= v^X(X_t, t | (X_0, X_1)) = X_1 - X_0. \end{aligned}$$

The *marginal velocity* associated with  $X$  is

$$\begin{aligned} v^X(x, t) &= \mathbb{E}[\Delta^X | X_t = x], \quad (x, t) \in \mathbb{R}^d \times [0, 1] \\ &= \int \Delta^X \cdot p(X_0, X_1 | X_t = x) d(X_0, X_1). \end{aligned}$$

When  $x \notin \text{supp}(X_t)$ , we set  $v^X(x, t) = 0$ . All statements below compare  $v^X$  only on sets where it is evaluated against a marginal law:  $\text{Law}(X_t)$ .

**Definition 2** (Rectifiability of  $X$ ). We say that  $X$  is *rectifiable* [2] if  $v^X(\cdot, t)$  is locally bounded for each  $t$  and the continuity equation

$$\partial_t \pi_t + \nabla \cdot (v^X(\cdot, t) \pi_t) = 0, \quad \pi_{t=0} = \text{Law}(X_0),$$

admits a unique solution  $\{\pi_t\}_{t \in [0,1]}$ . Equivalently, the ordinary differential equation  $\dot{X}_t = v^X(X_t, t)$  admits a unique flow of characteristics.

**Definition 3** (Non-intersection functional [2]). For any coupling  $(X_0, X_1)$  with linear interpolant  $X_t$ , define

$$V((X_0, X_1)) := \int_0^1 \mathbb{E}[\|\Delta^X - \mathbb{E}[\Delta^X | X_t]\|^2] dt.$$

**Lemma 1** (Non-intersection if and only if zero conditional variance). For a coupling  $(X_0, X_1)$  with linear interpolation  $X_t$ , the following are equivalent:

1. For two independent identically distributed couplings  $(X_0, X_1)$  and  $(X'_0, X'_1)$ ,

$$\begin{aligned} \exists t \in (0, 1) : (1-t)X_0 + tX_1 &= (1-t)X'_0 + tX'_1 \\ \mathbb{P}[(X_0, X_1) \neq (X'_0, X'_1)] &= 0. \end{aligned}$$

2.  $V((X_0, X_1)) = 0$ ; equivalently  $\Delta^X = \mathbb{E}[\Delta^X | X_t]$  for  $t \in [0, 1]$ .

*Proof.* (1)  $\Rightarrow$  (2): Non-intersection implies that the slope  $\Delta^X$  is a measurable function of  $(X_t, t)$ , hence  $\text{Var}(\Delta^X | X_t) = 0$ ; integrating over  $t$  gives  $V = 0$ . (2)  $\Rightarrow$  (1): If  $\Delta^X = \mathbb{E}[\Delta^X | X_t]$ , then the slope through any  $X_t$  is unique, two distinct lines cannot share a point at the same time unless they coincide.  $\square$

#### 1.2. The straight interpolation $Z$ compatible with $X$

**Definition 4** (Straight interpolation compatible with  $X$ ). A process  $Z = \{Z_t\}_{t \in [0,1]}$  on the same probability space as  $X$  is called a *straight interpolants* compatible with Flow Matching trajectories  $X$  if the following hold:

- (Z1) **Linear paths.** There exist random endpoints  $(Z_0, Z_1)$  with  $Z_t = (1-t)Z_0 + tZ_1$  and  $\Delta^Z := Z_1 - Z_0$ .
- (Z2) **Non-intersection.**  $V((Z_0, Z_1)) = 0$ . Equivalently,  $\Delta^Z = \mathbb{E}[\Delta^Z | Z_t]$  for  $t \in [0, 1]$ .
- (Z3) **Velocity-field matching.** With  $\mu_t = \text{Law}(Z_t)$ , for  $x \sim \mu_t$  and  $t \in [0, 1]$ ,

$$v^Z(x, t) := \mathbb{E}[\Delta^Z | Z_t = x] = v^X(x, t).$$

(Z4) **Initialization.**  $Z_0 = X_0$ .

*Remark 2* (Immediate consequences). From (Z2),  $v^Z(Z_t, t) = \Delta^Z$ , hence

$$Z_1 - Z_0 = \int_0^1 v^Z(Z_t, t) dt.$$

By (Z3),  $v^Z = v^X$  at  $x \sim \mu_t$ , so we also have

$$\Delta^Z = \int_0^1 v^X(Z_t, t) dt.$$

#### 1.3. Main results

**Theorem 3** (Marginal preservation). Assume  $X$  is *rectifiable* and  $Z$  satisfies *Definition 4*. Then  $\text{Law}(Z_t) = \text{Law}(X_t)$  for all  $t \in [0, 1]$ .

*Proof.* Let  $h : \mathbb{R}^d \rightarrow \mathbb{R}$  be any compactly supported continuously differentiable test function. Using (Z1) and (Z2),

$$\begin{aligned} \frac{d}{dt} \mathbb{E}[h(Z_t)] &= \mathbb{E}[\nabla h(Z_t)^\top \dot{Z}_t] = \mathbb{E}[\nabla h(Z_t)^\top \Delta^Z] \\ &= \mathbb{E}[\nabla h(Z_t)^\top v^Z(Z_t, t)]. \end{aligned}$$

By (Z3),  $v^Z(\cdot, t) = v^X(\cdot, t)$  for  $\mu_t$ , therefore

$$\frac{d}{dt} \mathbb{E}[h(Z_t)] = \mathbb{E}[\nabla h(Z_t)^\top v^X(Z_t, t)].$$

This shows that  $\mu_t = \text{Law}(Z_t)$  solves the continuity equation  $\partial_t \mu_t + \nabla \cdot (v^X(\cdot, t) \mu_t) = 0$  with  $\mu_0 = \text{Law}(Z_0) = \text{Law}(X_0)$  by (Z4). By rectifiability of  $X$ , the solution is unique and equals  $\pi_t = \text{Law}(X_t)$ . Hence  $\mu_t = \pi_t$  for all  $t \in [0, 1]$ .  $\square$

**Theorem 4** (Convex transport-cost reduction). *Under the assumptions of Theorem 3, for any convex  $c : \mathbb{R}^d \rightarrow \mathbb{R}$ ,*

$$\mathbb{E}[c(Z_1 - Z_0)] \leq \mathbb{E}[c(X_1 - X_0)].$$

*If  $c$  is strictly convex, equality holds if and only if  $V((X_0, X_1)) = 0$ .*

*Proof.* From (Z2),

$$Z_1 - Z_0 = \int_0^1 v^Z(Z_t, t) dt.$$

By Jensen's inequality in time,

$$\mathbb{E}[c(Z_1 - Z_0)] \leq \int_0^1 \mathbb{E}[c(v^Z(Z_t, t))] dt.$$

Using (Z3) and Theorem 3,

$$\begin{aligned} \int_0^1 \mathbb{E}[c(v^Z(Z_t, t))] dt &= \int_0^1 \mathbb{E}[c(v^X(X_t, t))] dt \\ &= \int_0^1 \mathbb{E}[c(\mathbb{E}[\Delta^X | X_t])] dt. \end{aligned}$$

A conditional Jensen inequality (conditioning on  $X_t$ ) yields

$$\mathbb{E}[c(\mathbb{E}[\Delta^X | X_t])] \leq \mathbb{E}[\mathbb{E}[c(\Delta^X) | X_t]] = \mathbb{E}[c(\Delta^X)].$$

Combining gives the inequality. If  $c$  is strictly convex, equality forces tightness of the conditional Jensen step, hence  $\Delta^X = \mathbb{E}[\Delta^X | X_t]$ , which by Lemma 1 is  $V((X_0, X_1)) = 0$ .  $\square$

**Theorem 5** (Equivalent characterizations of straight interpolants). *Assume  $X$  is rectifiable and  $Z$  satisfies Definition 4. The following are equivalent: when they hold, we say  $X$  yielded from couplings  $(X_0, X_1)$  are straight interpolants, which coincide with  $Z$ .*

- (i) **Tight convex cost.** *There exists a strictly convex  $c$  with  $\mathbb{E}[c(Z_1 - Z_0)] = \mathbb{E}[c(X_1 - X_0)]$ .*
- (ii) **Endpoint coincidence.**  $(Z_0, Z_1) = (X_0, X_1)$ .
- (iii) **Pathwise equality.**  $Z_t = X_t$  for all  $t \in [0, 1]$ .
- (iv) **Non-intersection for  $X$ .**  $V((X_0, X_1)) = 0$ .

*Proof.* 1. (iii)  $\implies$  (ii) is immediate.

2. (ii)  $\implies$  (i) turns the inequality of Theorem 4 into equality.

3. (i)  $\implies$  (iv): In Theorem 4 with strictly convex  $c$ , equality forces tightness of the conditional Jensen step; hence  $\Delta^X = \mathbb{E}[\Delta^X | X_t]$  for  $t \in [0, 1]$ , which is  $V((X_0, X_1)) = 0$  by Lemma 1.

4. (iv)  $\implies$  (iii): If  $V((X_0, X_1)) = 0$ , then for  $t \in [0, 1]$ ,  $\dot{X}_t = \Delta^X = v^X(X_t, t)$ . For  $Z$ , (Z2)–(Z3) give  $\dot{Z}_t = \Delta^Z = v^Z(Z_t, t) = v^X(Z_t, t)$ . Hence both  $X$  and  $Z$  solve  $\dot{Y}_t = v^X(Y_t, t)$  with the same initial value  $Y_0 = X_0 = Z_0$  by (Z4). Uniqueness of rectifiability in Definition 2 yields  $Z \equiv X$ .  $\square$

**Corollary 6** (One-step generation). *If any, and therefore all, of the items in Theorem 5 hold, then along each path  $v^X(X_t, t) \equiv \Delta^X$  is constant in  $t$  and the ordinary differential equation  $\dot{y}_t = v^X(y_t, t)$  integrates in one step:*

$$X_1 = X_0 + \int_0^1 v^X(X_t, t) dt = X_0 + \Delta^X.$$

#### 1.4. Equivalence with vanishing time derivative

**Definition 5** (Time derivative). For a differentiable vector field  $v : \mathbb{R}^d \times [0, 1] \rightarrow \mathbb{R}^d$ , the time derivative along its characteristics is

$$\begin{aligned} \frac{d}{dt} v(x, t) &= D_t v(x, t) := \frac{\partial v}{\partial t} \frac{dt}{dt} + \frac{\partial v}{\partial x} \frac{dx}{dt} \\ &= \frac{\partial}{\partial t} v(x, t) + (\nabla_x v(x, t)) v(x, t) \end{aligned}$$

**Theorem 7** (Straightness if and only if vanishing time derivative along  $X$ ). *Assume  $X$  is rectifiable and  $Z$  satisfies Definition 4. Assume moreover that  $v^X$  is continuously differentiable in  $(x, t)$ . Then  $V((X_0, X_1)) = 0$ , if and only if  $D_t v^X(X_t, t) = 0$ , for  $t \in [0, 1]$ .*

*Proof.*  $\implies$ : If  $V = 0$ , Theorem 5 gives  $Z \equiv X$  and  $v^X(X_t, t) = \Delta^X$ , which is constant in  $t$  along each path. The chain rule implies  $D_t v^X(X_t, t) = \partial_t v^X(X_t, t) + \nabla v^X(X_t, t) \dot{X}_t = 0$ .

$\impliedby$ : If  $D_t v^X(X_t, t) = 0$  for  $t \in [0, 1]$ , then  $v^X(X_t, t)$  is constant in  $t$  along each path. With  $Z_0 = X_0$ , the solution has the linear form  $X_t = (1-t)X_0 + tX_1$  and distinct trajectories cannot intersect because the ordinary differential equation with a well-posed vector field has unique solutions. By Theorem 3,  $\text{Law}(Z_t) = \text{Law}(X_t)$  for all  $t$ . Applying Theorem 5 then yields  $V((X_0, X_1)) = 0$ .  $\square$

## 2. Implementation

### 2.1. Model Setup

For the CIFAR-10 experiments, we construct the generative model  $v_\theta$  using the EDM framework [1] with the DDPM++ architecture [4]. For the ImageNet  $256 \times 256$  experiments, we adopt the same architecture as SiT-XL/2 [3] for the generative model  $v_\theta$ .

Across both settings, the primary difference lies in how the input latent code  $z$  is incorporated. As discussed previously, we identify two effective conditioning mechanisms: *adaptive normalization*, where  $z$  is added to the time embedding prior to computing the shift and offset parameters, and *bottleneck sum*, where the latent is fused with intermediate activations at the lowest resolution using a weighted sum before upsampling.

The latent code  $z$  is produced by two MLP layers and serves as a conditioning signal for the velocity network  $v_\theta$ . For the variational autoencoder  $q_\phi$ , we use the same backbone architecture as the generative model  $v_\theta$ , but with reduced block depth and modified output layers to produce the latent code  $z$ .

### 2.2. Model Configurations

For the CIFAR-10 experiments, the configuration of the model is shown in Table 1. For the ImageNet  $256 \times 256$  experiments, the configuration of the model is shown in Table 2.

### 2.3. Hardware Specifications

For the CIFAR-10 experiments, we use  $8 \times$  A100 (80G) GPU for all settings. For the ImageNet  $256 \times 256$  experiments, we use  $16 \times$  A100 (80G) GPU for all settings.

## 3. Ablation Study

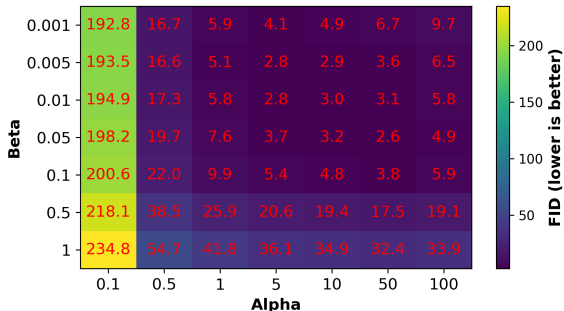

Figure 1. **Ablation Study Results by Adjusting  $\alpha$  and  $\beta$  on CIFAR-10 Dataset.** The value in the grid represents the FID score of one-step generation (NFE = 1), lower is better.

To evaluate the contribution of each hyperparameter to S-VFM, we conduct an ablation study by evaluating the generation performance while varying the hyperparameters

$\alpha$  and  $\beta$ . Figure 1 presents the one-step generation FID scores for different combinations of  $\alpha$  and  $\beta$  on the CIFAR-10 dataset in a heatmap format, where lower values indicate better performance. The results show that S-VFM exhibits a stable performance plateau around the optimal region, suggesting the method is relatively insensitive to hyperparameter variations and demonstrating its adaptive robustness.

## 4. Discussion on Broader Applications

The theoretical and empirical advantages of *Straight Variational Flow Matching* (S-VFM) suggest potential extensions across several frontier generative tasks. First, our focus on straight, non-intersecting trajectories provides a natural synergy with Dataset Distillation (DD). The efficiency of S-VFM in single-step synthesis can significantly accelerate the generation of synthetic training sets, building upon the representativeness improvements in diffusion-based distillation [8] and the hierarchical amplification strategies of HIERAMP [9]. Second, the inference efficiency of S-VFM makes it a strong candidate for **mobile and streaming applications**, such as the video generation paradigms explored in S2DiT [10], where reducing Function Evaluations (NFE) is critical for real-time deployment.

Furthermore, the variational latent code  $z$  in our framework, which captures a global “generation overview”, could be adapted for Test-Time Adaptation (TTA) and Visual Prompting. By leveraging the connection between straight flows and Optimal Transport, S-VFM could enhance OT-guided prompting methods like OT-VP [6] or facilitate dynamic adaptation through prompt coresets [7]. Finally, the structural consistency achieved by penalizing velocity field variations is vital for medically accurate image synthesis. S-VFM’s stable generation paths could be integrated with expert feedback loops, similar to the Doctor Approved [5] framework, to ensure that the generated content maintains high fidelity to domain-specific constraints.

| Parameter                             | Value               | Description                                                    |
|---------------------------------------|---------------------|----------------------------------------------------------------|
| <b>— Model Architecture (S-VFM) —</b> |                     |                                                                |
| img_resolution                        | 32                  | Input/output spatial size inherited from CIFAR-10              |
| in_channels / out_channels            | 3 / 3               | RGB inputs and velocity outputs share channels                 |
| embedding_type                        | positional          | Sinusoidal noise embeddings for EDM schedule                   |
| encoder_type / decoder_type           | standard / standard | Plain UNet backbone without auxiliary paths                    |
| model_channels                        | 128                 | Base channel width before multipliers                          |
| channel_mult                          | [2, 2, 2]           | Per-resolution width multipliers across three scales           |
| num_blocks                            | 3                   | Residual blocks per resolution stage                           |
| dropout                               | 0.1                 | Activation dropout inside UNet blocks                          |
| resample_filter                       | [1, 1]              | FIR filter for up-/downsampling convolutions                   |
| latent_dim                            | 768                 | Latent conditioning width injected via <code>map_latent</code> |
| phi_hidden_channels                   | 128                 | Width of latent encoder CNN backbone                           |
| phi_num_layers                        | 2                   | Number of convolutional layers in latent encoder               |
| phi_time_embedding_dim                | 512                 | Timestamp embedding dimension for latent encoder               |
| sigma_min / sigma_max                 | 0.002 / 80.0        | EDM noise schedule bounds                                      |
| $\alpha$                              | 10.0                | $\alpha$ in the proposed S-VFM                                 |
| $\beta$                               | 1e-2                | $\beta$ in the proposed S-VFM                                  |
| <b>— Training / Optimization —</b>    |                     |                                                                |
| batch_size                            | 512                 | Global batch size                                              |
| use_ema                               | True                | Whether to maintain an exponential moving average of weights   |
| ema_rate                              | 0.9999              | EMA decay factor                                               |
| ema_type                              | traditional         | EMA update style                                               |
| class_conditional                     | True                | Enables training with class labels                             |
| total_training_steps                  | 400000              | Number of optimization iterations                              |
| velocity_learning_rate                | 0.0002              | Learning rate for velocity (UNet) parameters                   |
| phi_learning_rate                     | 0.0002              | Learning rate for latent encoder                               |
| velocity_weight_decay                 | 0.0                 | Weight decay applied to velocity network                       |
| phi_weight_decay                      | 0.0                 | Weight decay applied to latent encoder                         |

Table 1. **Configuration of S-VFM on CIFAR-10.** Architecture follows the EDM [1] of the DDPM++ [4] setting.

| Parameter                             | Value            | Description                                                    |
|---------------------------------------|------------------|----------------------------------------------------------------|
| <b>— Model Architecture (S-VFM) —</b> |                  |                                                                |
| <code>img_resolution</code>           | $256 \times 256$ | Input/output resolution on ImageNet-1k                         |
| <code>params (M)</code>               | 677              | Number of learnable parameters                                 |
| <code>depth</code>                    | 28               | Transformer block layers                                       |
| <code>hidden_dim</code>               | 1152             | Token embedding / MLP width                                    |
| <code>num_heads</code>                | 16               | Attention heads per block                                      |
| <code>patch_size</code>               | $2 \times 2$     | Image patch size for tokenization                              |
| <code>latent_dim</code>               | 1152             | Latent conditioning width injected via <code>map_latent</code> |
| <code>phi_num_layers</code>           | 3                | Number of depth                                                |
| $\alpha$                              | 10.0             | $\alpha$ in the proposed S-VFM                                 |
| $\beta$                               | 1e-2             | $\beta$ in the proposed S-VFM                                  |
| <b>— Training / Optimization —</b>    |                  |                                                                |
| <code>epochs</code>                   | 240              | Total training epochs on ImageNet-1k                           |
| <code>batch_size</code>               | 256              | Global batch size                                              |
| <code>optimizer</code>                | Adam             | Optimizer for all parameters                                   |
| <code>lr_schedule</code>              | constant         | Learning rate schedule                                         |
| <code>learning_rate</code>            | 0.0002           | Base learning rate                                             |
| Adam ( $\beta_1, \beta_2$ )           | (0.9, 0.95)      | Adam momentum parameters                                       |
| <code>weight_decay</code>             | 0.0              | Weight decay                                                   |
| <code>use_ema</code>                  | True             | Maintain EMA of model weights                                  |
| <code>ema_decay</code>                | 0.9999           | EMA decay rate                                                 |
| <code>ema_type</code>                 | traditional      | EMA update style                                               |
| <code>class_conditional</code>        | True             | Trained with class labels                                      |
| <code>total_training_steps</code>     | 400000           | Number of optimization iterations                              |

Table 2. Configuration of S-VFM on ImageNet-1k/256. Architecture follows the SiT-XL/2 [3] setting.

## References

- [1] Tero Karras, Miika Aittala, Timo Aila, and Samuli Laine. Elucidating the design space of diffusion-based generative models. *Advances in neural information processing systems*, 35:26565–26577, 2022. [3](#), [4](#)
- [2] Xingchao Liu, Chengyue Gong, and qiang liu. Flow straight and fast: Learning to generate and transfer data with rectified flow. In *The Eleventh International Conference on Learning Representations*, 2023. [1](#)
- [3] Nanye Ma, Mark Goldstein, Michael S Albergo, Nicholas M Boffi, Eric Vanden-Eijnden, and Saining Xie. Sit: Exploring flow and diffusion-based generative models with scalable interpolant transformers. In *European Conference on Computer Vision*, pages 23–40. Springer, 2024. [3](#), [5](#)
- [4] Yang Song, Jascha Sohl-Dickstein, Diederik P Kingma, Abhishek Kumar, Stefano Ermon, and Ben Poole. Score-based generative modeling through stochastic differential equations. In *International Conference on Learning Representations*, 2021. [3](#), [4](#)
- [5] Janet Wang, Yunbei Zhang, Zhengming Ding, and Jihun Hamm. Doctor approved: Generating medically accurate skin disease images through ai-expert feedback. In *Advances in Neural Information Processing Systems (NeurIPS)*, 2025. [3](#)
- [6] Yunbei Zhang, Akshay Mehra, and Jihun Hamm. Ot-vp: Optimal transport-guided visual prompting for test-time adaptation. In *IEEE/CVF Winter Conference on Applications of Computer Vision (WACV)*, pages 1122–1132. IEEE, 2025. Oral Presentation. [3](#)
- [7] Yunbei Zhang, Akshay Mehra, Shuaicheng Niu, and Jihun Hamm. Dpcore: Dynamic prompt coreset for continual test-time adaptation. In *Forty-second International Conference on Machine Learning (ICML)*, 2025. [3](#)
- [8] Lin Zhao, Yushu Wu, Xinru Jiang, Jianyang Gu, Yanzhi Wang, Xiaolin Xu, Pu Zhao, and Xue Lin. Taming diffusion for dataset distillation with high representativeness. In *International Conference on Machine Learning*, pages 77760–77780. PMLR, 2025. [3](#)
- [9] Lin Zhao, Xinru Jiang, Xi Xiao, Qihui Fan, Lei Lu, Yanzhi Wang, Xue Lin, Octavia Camps, Pu Zhao, and Jianyang Gu. Hieramp: Coarse-to-fine autoregressive amplification for generative dataset distillation. *arXiv preprint arXiv:2603.06932*, 2026. [3](#)
- [10] Lin Zhao, Yushu Wu, Aleksei Lebedev, Dishani Lahiri, Meng Dong, Arpit Sahni, Michael Vasilkovsky, Hao Chen, Ju Hu, Aliaksandr Siarohin, et al. S2dit: Sandwich diffusion transformer for mobile streaming video generation. *arXiv preprint arXiv:2601.12719*, 2026. [3](#)
